# Supplementary material for: Comparison of Postnatal Growth Charts of Singleton Preterm and Term Infants Using World Health Organization Standards at 40–160 Weeks Postmenstrual Age: A Chinese Single-Center Retrospective Cohort Study
Source: Front Pediatr. 2021 Mar 15;9:595882. doi: 10.3389/fped.2021.595882 (PMC8005644; doi:10.3389/fped.2021.595882)
Supplement: Supplementary file 1 [file Data_Sheet_1.ZIP]

Archive with 21 entries (18 files):
- Supplementary tables/
- Supplementary tables/Supplementary Table 1 GAMLSS model of preterm and term infants.docx
- Supplementary tables/Supplementary Table 2 Growth charts_Preterm/
- Supplementary tables/Supplementary Table 2 Growth charts_Preterm/Supplementary Table 2-(A) Length_preterm_boy.xlsx
- Supplementary tables/Supplementary Table 2 Growth charts_Preterm/Supplementary Table 2-(B) Length_preterm_girl.xlsx
- Supplementary tables/Supplementary Table 2 Growth charts_Preterm/Supplementary Table 2-(C) Weight_preterm_boy.xlsx
- Supplementary tables/Supplementary Table 2 Growth charts_Preterm/Supplementary Table 2-(D) Weight_preterm_girl.xlsx
- Supplementary tables/Supplementary Table 2 Growth charts_Preterm/Supplementary Table 2-(E) HC_preterm_boy.xlsx
- Supplementary tables/Supplementary Table 2 Growth charts_Preterm/Supplementary Table 2-(F) HC_preterm_girl.xlsx
- Supplementary tables/Supplementary Table 2 Growth charts_Preterm/Supplementary Table 2-(G) BMI_preterm_boy.xlsx
- Supplementary tables/Supplementary Table 2 Growth charts_Preterm/Supplementary Table 2-(H) BMI_preterm_girl.xlsx
- Supplementary tables/Supplementary Table 3 Growth charts_Term/
- Supplementary tables/Supplementary Table 3 Growth charts_Term/Supplementary Table 3-(A) Length_term_boy.xlsx
- Supplementary tables/Supplementary Table 3 Growth charts_Term/Supplementary Table 3-(B) Length_term_girl.xlsx
- Supplementary tables/Supplementary Table 3 Growth charts_Term/Supplementary Table 3-(C) Weight_term_boy.xlsx
- Supplementary tables/Supplementary Table 3 Growth charts_Term/Supplementary Table 3-(D) Weight_term_girl.xlsx
- Supplementary tables/Supplementary Table 3 Growth charts_Term/Supplementary Table 3-(E) HC_term_boy.xlsx
- Supplementary tables/Supplementary Table 3 Growth charts_Term/Supplementary Table 3-(F) HC_term_girl.xlsx
- Supplementary tables/Supplementary Table 3 Growth charts_Term/Supplementary Table 3-(G) BMI_term_boy.xlsx
- Supplementary tables/Supplementary Table 3 Growth charts_Term/Supplementary Table 3-(H) BMI_term_girl.xlsx
- Supplementary tables/Supplementary Table 4 Difference values between preterm and term, preterm and WHO.docx
