# Supplementary material for: Comparison of Postnatal Growth Charts of Singleton Preterm and Term Infants Using World Health Organization Standards at 40–160 Weeks Postmenstrual Age: A Chinese Single-Center Retrospective Cohort Study
Source: Front Pediatr. 2021 Mar 15;9:595882. doi: 10.3389/fped.2021.595882 (PMC8005644; doi:10.3389/fped.2021.595882)
Supplement: Supplementary file 1 [file Data_Sheet_1.ZIP › Supplementary tables/Supplementary Table 2 Growth charts_Preterm/Supplementary Table 2-(A) Length_preterm_boy.xlsx]

## Sheet: Length_preterm_boy
PMA(week)	P3	P10	P25	P50	P75	P90	P97
40	48.08	49.63	51.11	52.65	54.1	55.35	56.52
44	51.98	53.54	55.05	56.63	58.13	59.43	60.65
48	55.43	56.99	58.51	60.12	61.65	62.98	64.25
52	58.26	59.82	61.33	62.94	64.5	65.85	67.14
56	60.59	62.13	63.63	65.24	66.8	68.17	69.47
60	62.56	64.08	65.58	67.19	68.76	70.13	71.45
64	64.24	65.75	67.25	68.86	70.44	71.83	73.17
68	65.68	67.2	68.7	70.33	71.92	73.32	74.68
72	66.97	68.49	69.99	71.64	73.25	74.67	76.05
76	68.15	69.68	71.2	72.86	74.5	75.94	77.35
80	69.27	70.81	72.35	74.04	75.7	77.17	78.61
84	70.33	71.89	73.46	75.17	76.86	78.36	79.83
88	71.34	72.92	74.51	76.25	77.97	79.5	81
92	72.31	73.91	75.52	77.29	79.04	80.61	82.15
96	73.26	74.88	76.52	78.32	80.11	81.71	83.28
100	74.21	75.85	77.52	79.35	81.18	82.82	84.43
104	75.16	76.84	78.53	80.4	82.27	83.94	85.59
108	76.1	77.8	79.52	81.43	83.34	85.05	86.73
112	77.06	78.79	80.54	82.48	84.42	86.17	87.9
116	77.97	79.72	81.5	83.48	85.46	87.25	89.02
120	78.83	80.61	82.42	84.43	86.45	88.28	90.09
124	79.65	81.45	83.28	85.33	87.39	89.25	91.1
128	80.42	82.25	84.11	86.19	88.29	90.18	92.07
132	81.18	83.03	84.92	87.03	89.17	91.1	93.02
136	81.88	83.75	85.67	87.82	89.99	91.95	93.92
140	82.55	84.45	86.39	88.57	90.77	92.78	94.77
144	83.17	85.09	87.06	89.27	91.51	93.55	95.58
148	83.76	85.7	87.69	89.93	92.2	94.28	96.35
152	84.31	86.27	88.28	90.56	92.86	94.97	97.08
156	84.83	86.81	88.85	91.15	93.5	95.64	97.78
160	85.34	87.34	89.4	91.73	94.11	96.28	98.46
