# Supplementary material for: Comparison of Postnatal Growth Charts of Singleton Preterm and Term Infants Using World Health Organization Standards at 40–160 Weeks Postmenstrual Age: A Chinese Single-Center Retrospective Cohort Study
Source: Front Pediatr. 2021 Mar 15;9:595882. doi: 10.3389/fped.2021.595882 (PMC8005644; doi:10.3389/fped.2021.595882)
Supplement: Supplementary file 1 [file Data_Sheet_1.ZIP › Supplementary tables/Supplementary Table 2 Growth charts_Preterm/Supplementary Table 2-(B) Length_preterm_girl.xlsx]

## Sheet: Length_preterm_girl
PMA(week)	P3	P10	P25	P50	P75	P90	P97
40	47.32	48.84	50.27	51.73	53.09	54.24	55.32
44	50.97	52.53	54	55.53	56.95	58.17	59.31
48	54.22	55.79	57.29	58.86	60.35	61.61	62.81
52	56.86	58.44	59.96	61.56	63.08	64.38	65.62
56	59.07	60.65	62.18	63.79	65.34	66.67	67.94
60	60.99	62.57	64.1	65.73	67.3	68.65	69.95
64	62.65	64.23	65.76	67.41	68.99	70.37	71.69
68	64.12	65.7	67.24	68.89	70.5	71.89	73.24
72	65.47	67.05	68.6	70.27	71.89	73.31	74.68
76	66.72	68.31	69.87	71.56	73.2	74.65	76.04
80	67.9	69.49	71.07	72.78	74.45	75.92	77.34
84	69.03	70.63	72.23	73.96	75.66	77.15	78.61
88	70.11	71.73	73.34	75.1	76.83	78.35	79.84
92	71.47	73.11	74.75	76.55	78.31	79.88	81.4
96	72.2	73.85	75.51	77.32	79.11	80.7	82.26
100	73.23	74.91	76.59	78.43	80.26	81.88	83.47
104	74.23	75.93	77.63	79.51	81.37	83.03	84.65
108	75.18	76.9	78.63	80.54	82.44	84.13	85.8
112	76.09	77.83	79.59	81.53	83.46	85.19	86.88
116	76.95	78.71	80.5	82.47	84.43	86.2	87.93
120	77.8	79.58	81.39	83.39	85.39	87.19	88.96
124	78.64	80.45	82.28	84.31	86.34	88.17	89.98
128	79.48	81.31	83.16	85.22	87.29	89.16	91
132	80.31	82.16	84.04	86.13	88.23	90.13	92.01
136	81.13	83	84.9	87.02	89.16	91.09	93.01
140	81.92	83.81	85.73	87.88	90.05	92.02	93.97
144	82.67	84.58	86.52	88.7	90.9	92.9	94.89
148	83.39	85.32	87.28	89.49	91.72	93.75	95.77
152	84.09	86.03	88.01	90.25	92.51	94.57	96.62
156	84.76	86.71	88.72	90.98	93.27	95.36	97.45
160	85.41	87.38	89.41	91.69	94.01	96.13	98.25
