# Supplementary material for: Comparison of Postnatal Growth Charts of Singleton Preterm and Term Infants Using World Health Organization Standards at 40–160 Weeks Postmenstrual Age: A Chinese Single-Center Retrospective Cohort Study
Source: Front Pediatr. 2021 Mar 15;9:595882. doi: 10.3389/fped.2021.595882 (PMC8005644; doi:10.3389/fped.2021.595882)
Supplement: Supplementary file 1 [file Data_Sheet_1.ZIP › Supplementary tables/Supplementary Table 2 Growth charts_Preterm/Supplementary Table 2-(D) Weight_preterm_girl.xlsx]

## Sheet: Weight_preterm_girl
PMA(week)	P3	P10	P25	P50	P75	P90	P97
40	2.6	3	3.36	3.69	4.02	4.34	4.68
44	3.39	3.87	4.3	4.72	5.14	5.55	5.98
48	4.14	4.68	5.18	5.68	6.18	6.67	7.2
52	4.73	5.31	5.85	6.41	6.97	7.53	8.13
56	5.22	5.81	6.39	6.99	7.59	8.21	8.87
60	5.65	6.26	6.86	7.5	8.15	8.81	9.52
64	6.01	6.64	7.26	7.91	8.6	9.3	10.06
68	6.31	6.95	7.58	8.26	8.97	9.7	10.49
72	6.59	7.22	7.86	8.56	9.3	10.05	10.88
76	6.83	7.47	8.12	8.83	9.59	10.36	11.23
80	7.05	7.69	8.34	9.07	9.84	10.64	11.53
84	7.24	7.88	8.54	9.28	10.07	10.89	11.8
88	7.42	8.06	8.72	9.47	10.27	11.1	12.04
92	7.65	8.29	8.96	9.71	10.54	11.4	12.37
96	7.74	8.38	9.05	9.81	10.64	11.5	12.47
100	7.92	8.56	9.24	10.01	10.85	11.73	12.72
104	8.1	8.75	9.43	10.21	11.07	11.96	12.97
108	8.29	8.93	9.62	10.41	11.28	12.2	13.23
112	8.47	9.12	9.81	10.61	11.5	12.42	13.48
116	8.64	9.29	9.99	10.8	11.7	12.65	13.72
120	8.81	9.47	10.17	10.99	11.91	12.87	13.96
124	8.98	9.64	10.35	11.18	12.11	13.08	14.2
128	9.15	9.82	10.53	11.38	12.32	13.31	14.44
132	9.33	10	10.72	11.57	12.53	13.54	14.69
136	9.51	10.18	10.9	11.77	12.74	13.76	14.94
140	9.67	10.34	11.07	11.95	12.93	13.97	15.16
144	9.81	10.48	11.22	12.1	13.1	14.15	15.36
148	9.93	10.61	11.35	12.23	13.24	14.3	15.52
152	10.04	10.71	11.45	12.34	13.35	14.42	15.66
156	10.12	10.8	11.54	12.43	13.45	14.53	15.78
160	10.2	10.88	11.62	12.51	13.53	14.62	15.87
