# Supplementary material for: Comparison of Postnatal Growth Charts of Singleton Preterm and Term Infants Using World Health Organization Standards at 40–160 Weeks Postmenstrual Age: A Chinese Single-Center Retrospective Cohort Study
Source: Front Pediatr. 2021 Mar 15;9:595882. doi: 10.3389/fped.2021.595882 (PMC8005644; doi:10.3389/fped.2021.595882)
Supplement: Supplementary file 1 [file Data_Sheet_1.ZIP › Supplementary tables/Supplementary Table 2 Growth charts_Preterm/Supplementary Table 2-(E) HC_preterm_boy.xlsx]

## Sheet: HC_preterm_boy
PMA(week)	P3	P10	P25	P50	P75	P90	P97
40	33.29	34.13	34.89	35.66	36.35	36.92	37.45
44	35.3	36.17	36.96	37.76	38.49	39.1	39.66
48	36.78	37.66	38.47	39.29	40.05	40.69	41.27
52	37.96	38.84	39.67	40.51	41.29	41.94	42.56
56	38.98	39.87	40.7	41.56	42.35	43.03	43.66
60	39.88	40.77	41.6	42.47	43.29	43.98	44.63
64	40.6	41.49	42.33	43.21	44.03	44.74	45.4
68	41.18	42.06	42.91	43.79	44.63	45.34	46.02
72	41.7	42.58	43.43	44.32	45.16	45.89	46.57
76	42.19	43.07	43.92	44.81	45.67	46.4	47.09
80	42.64	43.52	44.37	45.27	46.12	46.86	47.57
84	43.02	43.89	44.74	45.64	46.51	47.26	47.97
88	43.32	44.19	45.04	45.94	46.81	47.57	48.29
92	43.57	44.43	45.28	46.18	47.05	47.81	48.54
96	43.79	44.65	45.49	46.4	47.27	48.03	48.76
100	44.01	44.86	45.7	46.61	47.48	48.25	48.99
104	44.23	45.08	45.92	46.83	47.7	48.48	49.22
108	44.5	45.32	46.15	47.04	47.93	48.72	49.49
112	44.68	45.52	46.35	47.26	48.15	48.93	49.68
116	44.87	45.71	46.55	47.45	48.34	49.12	49.88
120	45.03	45.87	46.7	47.6	48.49	49.28	50.04
124	45.16	45.99	46.82	47.72	48.61	49.4	50.17
128	45.27	46.1	46.92	47.83	48.72	49.51	50.28
132	45.4	46.22	47.05	47.95	48.84	49.64	50.41
136	45.54	46.36	47.18	48.09	48.98	49.78	50.55
140	45.68	46.5	47.32	48.23	49.12	49.92	50.7
144	45.83	46.64	47.46	48.37	49.26	50.07	50.85
148	45.97	46.78	47.6	48.5	49.4	50.21	51
152	46.1	46.91	47.73	48.63	49.53	50.34	51.13
156	46.22	47.03	47.85	48.75	49.65	50.46	51.26
160	46.34	47.15	47.96	48.86	49.76	50.58	51.38
