# Supplementary material for: Comparison of Postnatal Growth Charts of Singleton Preterm and Term Infants Using World Health Organization Standards at 40–160 Weeks Postmenstrual Age: A Chinese Single-Center Retrospective Cohort Study
Source: Front Pediatr. 2021 Mar 15;9:595882. doi: 10.3389/fped.2021.595882 (PMC8005644; doi:10.3389/fped.2021.595882)
Supplement: Supplementary file 1 [file Data_Sheet_1.ZIP › Supplementary tables/Supplementary Table 2 Growth charts_Preterm/Supplementary Table 2-(F) HC_preterm_girl.xlsx]

## Sheet: HC_preterm_girl
PMA(week)	P3	P10	P25	P50	P75	P90	P97
40	32.41	33.33	34.12	34.86	35.56	36.21	36.86
44	34.32	35.25	36.07	36.84	37.57	38.26	38.95
48	35.8	36.74	37.56	38.36	39.12	39.83	40.56
52	36.96	37.89	38.73	39.54	40.31	41.05	41.8
56	37.95	38.88	39.72	40.54	41.33	42.08	42.86
60	38.84	39.77	40.61	41.44	42.25	43.02	43.81
64	39.62	40.54	41.38	42.22	43.04	43.83	44.64
68	40.3	41.21	42.06	42.9	43.73	44.53	45.36
72	40.9	41.81	42.65	43.5	44.34	45.15	45.99
76	41.41	42.31	43.15	44.01	44.85	45.67	46.52
80	41.83	42.72	43.56	44.42	45.27	46.09	46.95
84	42.16	43.04	43.87	44.73	45.59	46.41	47.28
88	42.43	43.3	44.14	44.99	45.85	46.68	47.56
92	42.51	43.37	44.19	45.04	45.89	46.73	47.61
96	42.93	43.78	44.6	45.46	46.32	47.16	48.05
100	43.16	44.01	44.83	45.68	46.55	47.39	48.28
104	43.39	44.23	45.04	45.89	46.76	47.61	48.51
108	43.59	44.43	45.24	46.09	46.96	47.81	48.71
112	43.78	44.6	45.41	46.26	47.13	47.98	48.89
116	43.94	44.76	45.56	46.41	47.28	48.14	49.05
120	44.09	44.9	45.7	46.55	47.42	48.27	49.19
124	44.22	45.03	45.82	46.67	47.54	48.4	49.32
128	44.37	45.17	45.96	46.8	47.67	48.54	49.46
132	44.52	45.31	46.1	46.95	47.82	48.68	49.61
136	44.68	45.47	46.25	47.1	47.97	48.84	49.77
140	44.84	45.63	46.41	47.25	48.13	49	49.93
144	45	45.78	46.55	47.4	48.27	49.15	50.09
148	45.14	45.92	46.69	47.54	48.41	49.29	50.23
152	45.28	46.05	46.82	47.66	48.54	49.42	50.37
156	45.4	46.17	46.94	47.78	48.66	49.54	50.49
160	45.52	46.28	47.05	47.89	48.77	49.65	50.61
