# Supplementary material for: Comparison of Postnatal Growth Charts of Singleton Preterm and Term Infants Using World Health Organization Standards at 40–160 Weeks Postmenstrual Age: A Chinese Single-Center Retrospective Cohort Study
Source: Front Pediatr. 2021 Mar 15;9:595882. doi: 10.3389/fped.2021.595882 (PMC8005644; doi:10.3389/fped.2021.595882)
Supplement: Supplementary file 1 [file Data_Sheet_1.ZIP › Supplementary tables/Supplementary Table 2 Growth charts_Preterm/Supplementary Table 2-(G) BMI_preterm_boy.xlsx]

## Sheet: BMI_preterm_boy
PMA(week)	P3	P10	P25	P50	P75	P90	P97
40	11.72	12.47	13.27	14.21	15.18	16.1	17.05
44	13.19	14	14.86	15.86	16.93	17.94	18.98
48	14.27	15.11	16	17.05	18.17	19.23	20.34
52	14.82	15.66	16.55	17.61	18.74	19.82	20.96
56	15.08	15.9	16.78	17.83	18.96	20.04	21.19
60	15.22	16.02	16.88	17.91	19.03	20.11	21.25
64	15.22	16	16.85	17.86	18.96	20.02	21.16
68	15.15	15.91	16.74	17.73	18.8	19.85	20.98
72	15.09	15.82	16.63	17.6	18.66	19.7	20.81
76	15.05	15.77	16.56	17.52	18.56	19.59	20.7
80	15.04	15.75	16.52	17.47	18.5	19.52	20.63
84	15	15.69	16.46	17.39	18.41	19.42	20.52
88	14.92	15.6	16.35	17.26	18.27	19.27	20.37
92	14.8	15.47	16.2	17.1	18.1	19.09	20.17
96	14.67	15.33	16.05	16.93	17.91	18.89	19.96
100	14.55	15.19	15.89	16.76	17.73	18.7	19.76
104	14.44	15.07	15.76	16.62	17.57	18.53	19.59
108	14.35	14.97	15.66	16.5	17.44	18.39	19.44
112	14.28	14.89	15.56	16.4	17.33	18.27	19.32
116	14.21	14.81	15.47	16.3	17.22	18.16	19.2
120	14.13	14.72	15.38	16.19	17.11	18.03	19.07
124	14.05	14.63	15.28	16.08	16.99	17.91	18.94
128	13.97	14.55	15.19	15.98	16.88	17.79	18.82
132	13.92	14.49	15.13	15.91	16.8	17.71	18.73
136	13.89	14.45	15.08	15.86	16.75	17.65	18.67
140	13.87	14.43	15.05	15.83	16.71	17.61	18.63
144	13.85	14.41	15.02	15.79	16.67	17.57	18.59
148	13.84	14.39	15	15.77	16.64	17.54	18.56
152	13.83	14.38	14.99	15.75	16.62	17.51	18.53
156	13.82	14.36	14.97	15.73	16.59	17.49	18.5
160	13.82	14.35	14.96	15.71	16.57	17.46	18.48
