# Supplementary material for: Comparison of Postnatal Growth Charts of Singleton Preterm and Term Infants Using World Health Organization Standards at 40–160 Weeks Postmenstrual Age: A Chinese Single-Center Retrospective Cohort Study
Source: Front Pediatr. 2021 Mar 15;9:595882. doi: 10.3389/fped.2021.595882 (PMC8005644; doi:10.3389/fped.2021.595882)
Supplement: Supplementary file 1 [file Data_Sheet_1.ZIP › Supplementary tables/Supplementary Table 3 Growth charts_Term/Supplementary Table 3-(A) Length_term_boy.xlsx]

## Sheet: Length_term_boy
PMA(week)	P3	P10	P25	P50	P75	P90	P97
40	48.2884	49.1829	49.9891	50.8412	51.7224	52.6135	53.6747
44	52.8157	53.8444	54.8085	55.8509	56.9311	58.0022	59.2303
48	56.3201	57.4473	58.5314	59.7212	60.9549	62.161	63.5071
52	59.2509	60.4366	61.5971	62.8826	64.2145	65.502	66.9102
56	61.6951	62.9136	64.1203	65.4651	66.8563	68.1892	69.6243
60	63.7023	64.9418	66.1798	67.5651	68.9959	70.3567	71.8044
64	65.3046	66.5597	67.8211	69.2364	70.6961	72.0765	73.5309
68	66.7087	67.9801	69.264	70.7073	72.1938	73.593	75.0561
72	67.9682	69.2593	70.5678	72.0409	73.5564	74.9773	76.4543
76	69.0871	70.4025	71.7395	73.2462	74.7947	76.2422	77.7394
80	70.1243	71.4689	72.8386	74.3835	75.9699	77.449	78.9729
84	71.1465	72.5242	73.9299	75.5166	77.1446	78.6593	80.2145
88	72.1144	73.5274	74.9713	76.6019	78.2736	79.8261	81.4158
92	73.0111	74.4617	75.9457	77.6221	79.3397	80.9323	82.5591
96	73.862	75.3529	76.8794	78.6043	80.3705	82.0059	83.673
100	74.7233	76.2562	77.827	79.602	81.4185	83.0984	84.8078
104	75.6208	77.1954	78.8097	80.634	82.4999	84.2234	85.9743
108	76.5296	78.142	79.7956	81.6641	83.5738	85.3359	87.1232
112	77.4304	79.0751	80.7621	82.6677	84.6141	86.408	88.2249
116	78.313	79.9849	81.6998	83.6362	85.6126	87.4321	89.2723
120	79.1851	80.8804	82.6192	84.5818	86.5833	88.4239	90.283
124	80.066	81.783	83.5437	85.5301	87.5542	89.4138	91.2897
128	80.9548	82.6925	84.474	86.4829	88.5284	90.4057	92.2973
132	81.8324	83.5897	85.3908	87.4207	89.4861	91.3798	93.2859
136	82.6804	84.4557	86.2746	88.3236	90.4069	92.3153	94.2341
140	83.4802	85.2711	87.1054	89.1706	91.2688	93.1892	95.1182
144	84.2191	86.0226	87.8691	89.947	92.0565	93.9857	95.9216
148	84.9069	86.7206	88.5767	90.6644	92.7823	94.7176	96.6579
152	85.5604	87.3826	89.2468	91.3424	93.4668	95.4065	97.3497
156	86.1917	88.0216	89.8929	91.9953	94.1253	96.0686	98.0137
160	86.8072	88.6443	90.5221	92.6308	94.7657	96.712	98.6588
