# Supplementary material for: Comparison of Postnatal Growth Charts of Singleton Preterm and Term Infants Using World Health Organization Standards at 40–160 Weeks Postmenstrual Age: A Chinese Single-Center Retrospective Cohort Study
Source: Front Pediatr. 2021 Mar 15;9:595882. doi: 10.3389/fped.2021.595882 (PMC8005644; doi:10.3389/fped.2021.595882)
Supplement: Supplementary file 1 [file Data_Sheet_1.ZIP › Supplementary tables/Supplementary Table 3 Growth charts_Term/Supplementary Table 3-(B) Length_term_girl.xlsx]

## Sheet: Length_term_girl
PMA(week)	P3	P10	P25	P50	P75	P90	P97
40	47.9632	48.9001	49.6845	50.4721	51.2673	52.0746	53.0597
44	51.6032	52.7041	53.7247	54.8116	55.9139	56.9775	58.1571
48	54.8442	56.0344	57.1865	58.4449	59.7247	60.9354	62.2272
52	57.7525	58.9206	60.0726	61.3441	62.6385	63.8521	65.1245
56	60.1415	61.2968	62.4454	63.7194	65.0172	66.2298	67.4923
60	62.068	63.2515	64.4322	65.7448	67.0838	68.3348	69.6359
64	63.6725	64.8971	66.12	67.4812	68.8718	70.1729	71.5283
68	64.992	66.2506	67.507	68.9063	70.3375	71.6795	73.0812
72	66.2458	67.5328	68.8165	70.2461	71.71	73.0857	74.5271
76	67.5124	68.8211	70.125	71.577	73.0652	74.4665	75.939
80	68.6959	70.0215	71.3413	72.8109	74.3184	75.7403	77.238
84	69.7139	71.0632	72.4064	73.9025	75.4389	76.8902	78.4223
88	70.664	72.0479	73.4262	74.9628	76.5425	78.0372	79.6179
92	71.6019	73.0257	74.4454	76.0301	77.6615	79.2071	80.8439
96	72.5248	73.9844	75.4422	77.0718	78.7517	80.3448	82.033
100	73.4464	74.9375	76.4301	78.1013	79.8262	81.4629	83.1973
104	74.3775	75.8975	77.4225	79.1333	80.901	82.5788	84.3562
108	75.319	76.8649	78.4198	80.1674	81.975	83.691	85.5076
112	76.2706	77.8386	79.4197	81.1999	83.0431	84.7927	86.6435
116	77.2312	78.8161	80.4183	82.2253	84.0977	85.8748	87.7527
120	78.1882	79.7861	81.4051	83.2342	85.1307	86.9302	88.8294
124	79.1207	80.7302	82.3649	84.2144	86.1335	87.9538	89.8726
128	80.013	81.6352	83.2863	85.1575	87.1004	88.9427	90.8826
132	80.8549	82.4923	84.1626	86.0585	88.0285	89.8962	91.8609
136	81.6388	83.2947	84.9876	86.9121	88.9135	90.811	92.8055
140	82.3599	84.0369	85.755	87.7115	89.7479	91.6788	93.7072
144	83.0155	84.7155	86.4609	88.4516	90.5257	92.4927	94.5582
148	83.6113	85.3356	87.1096	89.1361	91.2497	93.2548	95.3598
152	84.1559	85.9053	87.7086	89.7718	91.926	93.9704	96.1165
156	84.6592	86.4338	88.2668	90.3671	92.5623	94.6468	96.8348
160	85.1336	86.9336	88.7962	90.9337	93.1702	95.295	97.5256
