# Supplementary material for: Comparison of Postnatal Growth Charts of Singleton Preterm and Term Infants Using World Health Organization Standards at 40–160 Weeks Postmenstrual Age: A Chinese Single-Center Retrospective Cohort Study
Source: Front Pediatr. 2021 Mar 15;9:595882. doi: 10.3389/fped.2021.595882 (PMC8005644; doi:10.3389/fped.2021.595882)
Supplement: Supplementary file 1 [file Data_Sheet_1.ZIP › Supplementary tables/Supplementary Table 3 Growth charts_Term/Supplementary Table 3-(C) Weight_term_boy.xlsx]

## Sheet: Weight_term_boy
PMA(week)	P3	P10	P25	P50	P75	P90	P97
40	2.90458	3.12612	3.34296	3.58526	3.8415	4.09722	4.38892
44	3.84431	4.13113	4.41576	4.7371	5.07893	5.42034	5.80846
48	4.80481	5.15286	5.50364	5.90484	6.3359	6.76899	7.26267
52	5.63864	6.03221	6.43567	6.90439	7.41499	7.93363	8.53005
56	6.27315	6.69419	7.13296	7.6509	8.22378	8.81349	9.49995
60	6.74877	7.18522	7.64673	8.19957	8.82003	9.46743	10.2311
64	7.11812	7.56349	8.04026	8.6186	9.2761	9.97065	10.8002
68	7.43879	7.89119	8.3804	8.97998	9.669	10.4045	11.2927
72	7.70896	8.16688	8.66601	9.28279	9.99759	10.7669	11.704
76	7.93603	8.39869	8.90607	9.53687	10.2724	11.0686	12.0441
80	8.14586	8.61419	9.13	9.77393	10.5276	11.3459	12.3513
84	8.35276	8.82853	9.35399	10.0114	10.7819	11.619	12.6471
88	8.54806	9.03245	9.56817	10.2388	11.0243	11.8761	12.9188
92	8.73336	9.22734	9.7738	10.4574	11.2563	12.1196	13.1706
96	8.91539	9.41992	9.97778	10.6744	11.4861	12.3589	13.4145
100	9.07735	9.59206	10.1606	10.8691	11.6915	12.5709	13.6267
104	9.21398	9.7379	10.3159	11.0344	11.865	12.7483	13.8009
108	9.34412	9.87705	10.4642	11.1922	12.0305	12.917	13.966
112	9.47962	10.0218	10.6184	11.3564	12.2028	13.0934	14.1403
116	9.62449	10.1764	10.7828	11.5313	12.3868	13.2829	14.3298
120	9.78164	10.3436	10.9605	11.7205	12.5863	13.4893	14.5388
124	9.95311	10.5259	11.154	11.9264	12.8039	13.7156	14.7701
128	10.1334	10.7174	11.3572	12.1427	13.0327	13.9542	15.0152
132	10.3101	10.9051	11.5564	12.3546	13.2568	14.1879	15.2555
136	10.4741	11.0794	11.7413	12.5514	13.4647	14.4042	15.4772
140	10.6212	11.236	11.9076	12.7282	13.6512	14.5976	15.6744
144	10.7495	11.3727	12.053	12.8826	13.8136	14.7654	15.8441
148	10.8627	11.4936	12.1815	13.0192	13.9569	14.9126	15.9918
152	10.9662	11.6044	12.2994	13.1444	14.088	15.0469	16.1258
156	11.0645	11.7096	12.4114	13.2633	14.2124	15.1741	16.2524
160	11.1598	11.8117	12.5202	13.3788	14.3332	15.2975	16.3752
