# Supplementary material for: Comparison of Postnatal Growth Charts of Singleton Preterm and Term Infants Using World Health Organization Standards at 40–160 Weeks Postmenstrual Age: A Chinese Single-Center Retrospective Cohort Study
Source: Front Pediatr. 2021 Mar 15;9:595882. doi: 10.3389/fped.2021.595882 (PMC8005644; doi:10.3389/fped.2021.595882)
Supplement: Supplementary file 1 [file Data_Sheet_1.ZIP › Supplementary tables/Supplementary Table 3 Growth charts_Term/Supplementary Table 3-(D) Weight_term_girl.xlsx]

## Sheet: Weight_term_girl
PMA(week)	P3	P10	P25	P50	P75	P90	P97
40	2.80896	3.0199	3.23417	3.47085	3.71646	3.95543	4.20791
44	3.60818	3.87315	4.14519	4.44862	4.76879	5.08743	5.43145
48	4.40403	4.72148	5.05051	5.42079	5.81762	6.22124	6.6664
52	5.09633	5.45817	5.83634	6.26537	6.73188	7.21629	7.76189
56	5.66652	6.06393	6.48228	6.96023	7.48687	8.04446	8.68534
60	6.10551	6.52942	6.97831	7.49414	8.06926	8.68917	9.41546
64	6.46494	6.90998	7.38344	7.92997	8.54551	9.21973	10.0237
68	6.76366	7.22581	7.71917	8.29052	8.93947	9.66043	10.5338
72	7.02771	7.50476	8.01526	8.60769	9.28527	10.0474	10.9835
76	7.26765	7.75812	8.2838	8.89453	9.59697	10.3956	11.3885
80	7.47964	7.98177	8.52043	9.14646	9.86976	10.6997	11.7428
84	7.66634	8.17856	8.72823	9.36693	10.1076	10.9644	12.0512
88	7.84228	8.36399	8.92384	9.57395	10.33	11.211	12.3378
92	8.00516	8.53563	9.10473	9.76495	10.5346	11.4372	12.6002
96	8.14409	8.68191	9.2586	9.92683	10.7074	11.6281	12.8222
100	8.27505	8.81984	9.40362	10.0791	10.8696	11.8067	13.0294
104	8.41407	8.96651	9.55803	10.2415	11.0422	11.9962	13.2475
108	8.5675	9.12867	9.72902	10.4215	11.2338	12.2056	13.4866
112	8.73605	9.30713	9.91745	10.6203	11.4454	12.4363	13.7483
116	8.91627	9.49816	10.1194	10.8335	11.6723	12.6834	14.0273
120	9.10504	9.69845	10.3313	11.0573	11.9106	12.9425	14.3189
124	9.29961	9.90508	10.55	11.2885	12.1568	13.2099	14.6191
128	9.49339	10.111	10.7681	11.5191	12.4021	13.4763	14.9179
132	9.67578	10.3049	10.9734	11.736	12.6328	13.7266	15.1986
136	9.83791	10.4773	11.1559	11.9285	12.8373	13.9483	15.4474
140	9.97387	10.6219	11.3088	12.0895	13.0078	14.133	15.6551
144	10.0797	10.7345	11.4277	12.2141	13.1391	14.2752	15.8156
148	10.1588	10.8184	11.5162	12.3063	13.2356	14.3795	15.9341
152	10.2168	10.8801	11.5809	12.3731	13.3049	14.4543	16.0197
156	10.2595	10.9255	11.6283	12.4214	13.3543	14.5075	16.0814
160	10.2926	10.9607	11.665	12.4583	13.3915	14.5473	16.1282
