# Supplementary material for: Comparison of Postnatal Growth Charts of Singleton Preterm and Term Infants Using World Health Organization Standards at 40–160 Weeks Postmenstrual Age: A Chinese Single-Center Retrospective Cohort Study
Source: Front Pediatr. 2021 Mar 15;9:595882. doi: 10.3389/fped.2021.595882 (PMC8005644; doi:10.3389/fped.2021.595882)
Supplement: Supplementary file 1 [file Data_Sheet_1.ZIP › Supplementary tables/Supplementary Table 3 Growth charts_Term/Supplementary Table 3-(E) HC_term_boy.xlsx]

## Sheet: HC_term_boy
PMA(week)	P3	P10	P25	P50	P75	P90	P97
44	35.734	36.331	36.9178	37.5664	38.2316	38.8631	39.537
48	37.2568	37.8781	38.4873	39.1598	39.8495	40.5055	41.2075
52	38.5888	39.2315	39.86	40.5531	41.2639	41.941	42.6676
56	39.7173	40.3779	41.0227	41.7326	42.461	43.1558	43.9033
60	40.6277	41.3029	41.9603	42.6834	43.4253	44.1341	44.8987
64	41.3641	42.0511	42.7185	43.4518	44.2042	44.9241	45.7025
68	41.9911	42.6882	43.364	44.1056	44.8667	45.5958	46.3862
72	42.5283	43.2341	43.9169	44.6654	45.4336	46.1705	46.9712
76	42.9781	43.6912	44.3797	45.1336	45.9074	46.6507	47.4602
80	43.3599	44.0793	44.7726	45.5308	46.3092	47.0577	47.8749
84	43.6996	44.4247	45.1221	45.884	46.6662	47.4194	48.2434
88	44.0072	44.7375	45.4385	46.2037	46.9893	47.7466	48.577
92	44.2808	45.0158	45.72	46.4879	47.2763	48.0373	48.8734
96	44.5205	45.2597	45.9667	46.7368	47.5275	48.2916	49.1329
100	44.7369	45.4799	46.1893	46.9613	47.754	48.5209	49.367
104	44.943	45.6898	46.4015	47.1752	47.9698	48.7394	49.5901
108	45.1352	45.8856	46.5994	47.3748	48.1711	48.9431	49.7983
112	45.308	46.0616	46.7773	47.554	48.3517	49.1259	49.9852
116	45.4615	46.2181	46.9355	47.7132	48.512	49.2882	50.1512
120	45.5987	46.3581	47.0769	47.8554	48.6552	49.433	50.2995
124	45.7257	46.4877	47.2077	47.987	48.7875	49.5668	50.4367
128	45.8469	46.6115	47.3328	48.1127	48.9139	49.6948	50.5679
132	45.965	46.7321	47.4546	48.2352	49.0371	49.8194	50.6957
136	46.0808	46.8505	47.5742	48.3555	49.1581	49.9419	50.8214
140	46.1928	46.9649	47.6899	48.4717	49.275	50.0602	50.9429
144	46.2988	47.0734	47.7995	48.5819	49.3858	50.1724	51.0581
148	46.3989	47.1758	47.9029	48.6859	49.4903	50.2782	51.1669
152	46.4936	47.2728	48.0009	48.7843	49.5893	50.3784	51.27
156	46.5839	47.3652	48.0944	48.8782	49.6836	50.4739	51.3683
160	46.6709	47.4544	48.1845	48.9687	49.7746	50.566	51.4632
