# Supplementary material for: Comparison of Postnatal Growth Charts of Singleton Preterm and Term Infants Using World Health Organization Standards at 40–160 Weeks Postmenstrual Age: A Chinese Single-Center Retrospective Cohort Study
Source: Front Pediatr. 2021 Mar 15;9:595882. doi: 10.3389/fped.2021.595882 (PMC8005644; doi:10.3389/fped.2021.595882)
Supplement: Supplementary file 1 [file Data_Sheet_1.ZIP › Supplementary tables/Supplementary Table 3 Growth charts_Term/Supplementary Table 3-(F) HC_term_girl.xlsx]

## Sheet: HC_term_girl
PMA(week)	P3	P10	P25	P50	P75	P90	P97
44	34.9292	35.5467	36.1122	36.7096	37.3139	37.8986	38.5517
48	36.3133	36.9266	37.506	38.1302	38.7648	39.3728	40.0372
52	37.5477	38.1619	38.7557	39.405	40.0681	40.6999	41.3806
56	38.6068	39.2238	39.8307	40.5021	41.191	41.8453	42.5436
60	39.4933	40.1134	40.7317	41.422	42.1332	42.8078	43.523
64	40.2416	40.8647	41.4926	42.1989	42.9292	43.6214	44.3522
68	40.8701	41.4957	42.1314	42.8509	43.5971	44.3042	45.0485
72	41.4027	42.0304	42.6725	43.4027	44.1619	44.8812	45.6367
76	41.8603	42.4897	43.137	43.8758	44.6456	45.375	46.1396
80	42.26	42.8909	43.5424	44.2884	45.0669	45.8045	46.5767
84	42.6133	43.2455	43.9006	44.6525	45.4382	46.1826	46.9608
88	42.9242	43.5574	44.2154	44.9722	45.7637	46.5137	47.2969
92	43.1937	43.8276	44.4878	45.2484	46.0446	46.7988	47.5858
96	43.4254	44.0596	44.7214	45.4848	46.2845	47.0419	47.8316
100	43.6276	44.2618	44.9246	45.69	46.4921	47.2518	48.0433
104	43.8156	44.4496	45.113	45.8798	46.6838	47.445	48.2377
108	43.999	44.6327	45.2965	46.0642	46.8695	47.632	48.4254
112	44.1812	44.8144	45.4784	46.2469	47.0531	47.8163	48.6102
116	44.3639	44.9966	45.6605	46.4294	47.2363	48	48.794
120	44.5472	45.1793	45.8431	46.6122	47.4194	48.1833	48.9772
124	44.727	45.3585	46.022	46.791	47.5982	48.3621	49.1557
128	44.8985	45.5292	46.1921	46.9608	47.7678	48.5314	49.3245
132	45.0574	45.6871	46.3494	47.1175	47.924	48.687	49.4793
136	45.2007	45.8293	46.4907	47.2579	48.0636	48.8258	49.617
140	45.3279	45.9553	46.6156	47.3818	48.1864	48.9476	49.7374
144	45.44	46.0661	46.7252	47.4901	48.2935	49.0534	49.8418
148	45.5393	46.1639	46.8217	47.5852	48.3872	49.1457	49.9325
152	45.6288	46.252	46.9084	47.6705	48.4709	49.228	50.0131
156	45.7115	46.3332	46.9882	47.7488	48.5477	49.3032	50.0868
160	45.7894	46.4097	47.0633	47.8223	48.6197	49.3737	50.1556
