# Supplementary material for: Comparison of Postnatal Growth Charts of Singleton Preterm and Term Infants Using World Health Organization Standards at 40–160 Weeks Postmenstrual Age: A Chinese Single-Center Retrospective Cohort Study
Source: Front Pediatr. 2021 Mar 15;9:595882. doi: 10.3389/fped.2021.595882 (PMC8005644; doi:10.3389/fped.2021.595882)
Supplement: Supplementary file 1 [file Data_Sheet_1.ZIP › Supplementary tables/Supplementary Table 3 Growth charts_Term/Supplementary Table 3-(G) BMI_term_boy.xlsx]

## Sheet: BMI_term_boy
PMA(week)	P3	P10	P25	P50	P75	P90	P97
40	11.768	12.4164	13.072	13.8215	14.6222	15.4178	16.3104
44	12.9363	13.6417	14.36	15.187	16.0776	16.9698	17.9793
48	14.0543	14.8148	15.5941	16.4976	17.4778	18.4675	19.5966
52	14.8314	15.6286	16.4501	17.4086	18.4559	19.521	20.746
56	15.2046	16.0148	16.8538	17.8383	18.9206	20.0288	21.3126
60	15.3398	16.1473	16.987	17.9769	19.0711	20.198	21.5118
64	15.3893	16.1872	17.0197	18.0049	19.0989	20.231	21.5582
68	15.4054	16.1906	17.0121	17.9875	19.0745	20.2041	21.5346
72	15.384	16.1541	16.9618	17.9232	18.9981	20.1189	21.4444
76	15.3386	16.0928	16.8852	17.8306	18.8904	19.9988	21.3142
80	15.2852	16.0237	16.801	17.7299	18.7738	19.8683	21.1713
84	15.2226	15.9458	16.708	17.6205	18.648	19.7278	21.0169
88	15.1521	15.8604	16.6078	17.5041	18.515	19.5796	20.8537
92	15.0832	15.7773	16.5107	17.3912	18.3859	19.4355	20.6942
96	15.0206	15.7015	16.4214	17.2869	18.2659	19.3007	20.544
100	14.9349	15.6019	16.3079	17.1573	18.1195	19.1378	20.3636
104	14.8153	15.4676	16.1585	16.9905	17.9341	18.934	20.1396
108	14.685	15.3227	15.9986	16.8133	17.7381	18.7193	19.9041
112	14.5629	15.1869	15.8488	16.6472	17.5543	18.5178	19.6828
116	14.461	15.0729	15.7221	16.5059	17.3971	18.3448	19.492
120	14.3823	14.9834	15.6216	16.3924	17.2697	18.2034	19.3351
124	14.3233	14.9148	15.5432	16.3026	17.1676	18.089	19.2071
128	14.2766	14.8595	15.479	16.2281	17.082	17.9922	19.0979
132	14.232	14.8067	15.4177	16.157	17.0002	17.8998	18.9936
136	14.1828	14.7494	15.3521	16.0817	16.9144	17.8034	18.8853
140	14.1275	14.6861	15.2805	16.0005	16.8226	17.7009	18.7709
144	14.0655	14.6161	15.2023	15.9126	16.7241	17.5917	18.6495
148	13.9986	14.5413	15.1194	15.82	16.621	17.4779	18.5235
152	13.9289	14.4639	15.034	15.7252	16.5158	17.3622	18.3957
156	13.8583	14.3859	14.9481	15.6302	16.4107	17.2467	18.2683
160	13.7883	14.3087	14.8634	15.5366	16.3073	17.1333	18.1433
