# Supplementary material for: Comparison of Postnatal Growth Charts of Singleton Preterm and Term Infants Using World Health Organization Standards at 40–160 Weeks Postmenstrual Age: A Chinese Single-Center Retrospective Cohort Study
Source: Front Pediatr. 2021 Mar 15;9:595882. doi: 10.3389/fped.2021.595882 (PMC8005644; doi:10.3389/fped.2021.595882)
Supplement: Supplementary file 1 [file Data_Sheet_1.ZIP › Supplementary tables/Supplementary Table 3 Growth charts_Term/Supplementary Table 3-(H) BMI_term_girl.xlsx]

## Sheet: BMI_term_girl
PMA(week)	P3	P10	P25	P50	P75	P90	P97
40	11.5128	12.1802	12.8466	13.5935	14.3686	15.1113	15.9089
44	12.5339	13.2499	13.9722	14.792	15.6565	16.5	17.4243
48	13.4245	14.183	14.9547	15.8407	16.7887	17.7296	18.7815
52	14.089	14.878	15.6864	16.6234	17.6395	18.6645	19.8326
56	14.5195	15.3251	16.1551	17.1249	18.189	19.2784	20.5426
60	14.7271	15.5359	16.3723	17.3561	18.4465	19.5777	20.9128
64	14.8172	15.6217	16.4559	17.4421	18.5444	19.7015	21.0884
68	14.8636	15.661	16.489	17.4718	18.578	19.7513	21.1775
72	14.868	15.6561	16.4749	17.4495	18.553	19.734	21.1877
76	14.8272	15.6039	16.4109	17.3732	18.4679	19.6489	21.1194
80	14.7594	15.5237	16.3173	17.2647	18.3469	19.5224	21.0014
84	14.6875	15.4395	16.2194	17.151	18.2187	19.3857	20.8679
88	14.6063	15.3458	16.1115	17.0264	18.0777	19.233	20.7132
92	14.5054	15.2318	15.9824	16.8792	17.9118	19.0523	20.5252
96	14.3817	15.0941	15.8288	16.7061	17.7182	18.8408	20.3016
100	14.2548	14.9536	15.6725	16.5303	17.5214	18.6252	20.0715
104	14.1419	14.828	15.5322	16.3716	17.3426	18.4281	19.8596
108	14.0495	14.7244	15.4153	16.238	17.1905	18.2589	19.6767
112	13.9787	14.6439	15.323	16.1306	17.0664	18.1195	19.5251
116	13.9265	14.5833	15.252	16.0462	16.9671	18.0065	19.4017
120	13.8896	14.5392	15.1988	15.9811	16.8887	17.9161	19.3026
124	13.8645	14.5081	15.1597	15.9314	16.8272	17.8441	19.2238
128	13.8445	14.4827	15.1271	15.8891	16.7742	17.7816	19.1558
132	13.8193	14.4523	15.0898	15.8425	16.7171	17.7154	19.0841
136	13.7815	14.4092	15.0395	15.7828	16.6468	17.6355	18.9983
140	13.7274	14.3494	14.9723	15.7057	16.5586	17.5372	18.8929
144	13.6552	14.271	14.886	15.609	16.4501	17.4178	18.7651
148	13.5683	14.1774	14.7841	15.4963	16.3252	17.2813	18.6191
152	13.4713	14.0736	14.6719	15.3731	16.1896	17.1338	18.4613
156	13.3686	13.964	14.5538	15.2441	16.0482	16.9803	18.2973
160	13.2638	13.8523	14.4338	15.1134	15.9053	16.8255	18.132
